# Supplementary material for: Efficacy and Safety of the Natural Killer T Cell–Stimulatory Glycolipid OCH-NCNP1 for Patients With Relapsing Multiple Sclerosis: Protocol for a Randomized Placebo-Controlled Clinical Trial
Source: JMIR Res Protoc. 2024 Jan 15;13:e46709. doi: 10.2196/46709 (PMC10825757; doi:10.2196/46709)
Supplement: Multimedia Appendix 1 [file resprot_v13i1e46709_app1.docx]

**Multimedia Appendix 1.** Observation, examination, and survey schedule.

| **Item** | **Screening period** | **Before administration** | **Administration period** | | | | | | | | **Postobservation (T9)** | **Discontinuation of administration** |
| --- | --- | --- | --- | --- | --- | --- | --- | --- | --- | --- | --- | --- |
|  | S1a | B1 | T1 | T2 | T3 | T4 | T5 | T6 | T7 | T8 |  |  |
| **Number of days from the start date of administration**  **(weeks)** | -45 | 0 |  | 1 | 28  (4) | 56  (8) | 84  (12) | 112  (16) | 140  (20) | 168  (24) | 182  (26) |  |
| **Allowance (± days)** | - | - | - | - | ±7 | ±7 | ±7 | ±7 | ±7 | ±7 | ±7 |  |
| **Outpatient/Inpatient** | Outpatient | In | In | In | Out | Out | Out | Out | Out | Out | Out | Out |
| **Consent acquisition** | ○ |  |  |  |  |  |  |  |  |  |  |  |
| **Subject backgroundb** | ○ |  |  |  |  |  |  |  |  |  |  |  |
| **Urine pregnancy test** | ○ |  |  |  |  |  |  |  |  |  |  | ○ |
| **Infectious disease**  **or antibody tests** | ○ |  |  |  |  |  |  |  |  |  |  |  |
| **Medical examination** | ○ | ○ | ○ | ○ | ○ | ○ | ○ | ○ | ○ | ○ | ○ | ○ |
| **Vital signsc** | ○ | ○ | ○ | ○ | ○ | ○ | ○ | ○ | ○ | ○ | ○ | ○ |
| **EDSS/FS** | ○ |  |  |  | ○ | ○ | ○ | ○ | ○ | ○ |  | ○ |
| **Clinical tests (hematological testd, hematobiochemical teste, and urine testf)** | ○ | ○ |  | ○ | ○ | ○ | ○ | ○ | ○ | ○ |  | ○ |
| **12-lead ECG** | ○ | ○ |  |  |  | ○ |  | ○ |  | ○ |  | ○ |
| **Echocardiography** | ○ |  |  |  |  |  |  |  |  |  |  | ○ |
| **Chest or**  **abdominal X-ray test** | ○ |  |  |  |  |  |  |  |  |  |  | ○ |
| **Abdominal** **CT test** | ○ |  |  |  |  |  |  |  |  |  |  | ○ |
| **MRIg** | ○ |  |  |  |  |  | ○ |  |  | ○ |  | ○ |
| **Administration of investigational drug** |  |  | ○ |  | ○ | ○ | ○ | ○ | ○ |  |  |  |
| **Gene expression level measurement (RT-PCR)** |  | ○ |  | ○ |  |  |  |  |  | ○ |  | ○ |
| **Lymphocyte subsets, Th1, Th2, or Th17 cellsh** |  | ○ |  | ○ |  |  |  |  |  | ○ |  | ○ |
| **Intestinal and oral microbiome analysis** | ○ |  |  |  |  |  |  |  |  | ○ |  | ○ |
| **C-SSRS** | ○ |  |  |  |  |  | ○ |  |  | ○ |  | ○ |
| **Adverse events**  **survey period** |  |  |  |  |  |  |  |  |  |  |  |  |
| **Concomitant drugs or**  **combination therapies** |  |  |  |  |  |  |  |  |  |  |  |  |

Abbreviations: C-SRSS, Columbia Suicide Severity Rating Scale; ECG, electrocardiogram; EDSS, Expanded Disability Status Scale; FS, functional disability scale; MRI, magnetic resonance imaging; RT-PCR, reverse transcription-polymerase chain reaction.

aInvestigational drug can be assigned using a case enrollment system based on the results of the screening period.

bIncluding birth date, sex, body height, and body weight.

cBlood pressure, pulse rate, body temperature, and breathing rate; T1 vital signs were measured 2 ± 1 h after administration of the investigational drug and no time is specified for other vital sign measurements.

dRed blood cell count, platelet count, hemoglobin, hematocrit, white blood cell count, and differential white blood count (lymphocytes)

eAlanine aminotransferase, aspartate aminotransferase, gamma-glutamyl transpeptidase, total bilirubin, direct bilirubin, albumin, creatinine, amylase, total cholesterol, neutral fat, high density lipoprotein cholesterol, low density lipoprotein cholesterol, blood glucose, C-reactive protein, sodium, potassium, chloride, total protein, albumin-globulin ratio, blood urea nitrogen, creatine kinase and lactate dehydrogenase.

fUrine protein, urine glucose, urine white blood cells, and urine occult blood.

gMRI was performed at the National Center of Neurology and Psychiatry.

hThis study was performed only on patients enrolled at the National Center of Neurology and Psychiatry.
